# Supplementary material for: Rare earth metal La-doped induced electrochemical evolution of LiV3O8 with an oxygen vacancy toward a high energy-storage capacity
Source: Royal Society of Chemistry journal article supplement (doi:10.1039/d0ta10755g), 2020-12-10
Supplement: d0ta10755g1.pdf [file d0ta10755g1.pdf]

## Supporting Information:

### Rare Earth Metal La-doped induced Electrochemical Evolution of $\text{LiV}_3\text{O}_8$ with Oxygen Vacancy towards High Energy- storage Capacity

Peng Ge<sup>a</sup>, Shaohui Yuan<sup>a</sup>, Wenqing Zhao<sup>a</sup>, Limin Zhang<sup>a</sup>, Yue Yang<sup>a</sup>, Lingling Xie<sup>c,d</sup>, Limin Zhu,<sup>\*b,d</sup> and Xiaoyu Cao<sup>\*b,d</sup>

*<sup>a</sup>School of Minerals Processing and Bioengineering, Central South University, Changsha 410083, China.*

*<sup>b</sup>School of Chemistry and Chemical Engineering, Henan University of Technology, Zhengzhou 450001, PR Chinae.*

*<sup>c</sup>School of Environmental Engineering, Henan University of Technology, Zhengzhou 450001, PR China*

*<sup>d</sup>Key Laboratory of High Specific Energy Materials for Electrochemical Power Sources of Zhengzhou City, Henan University of Technology, Zhengzhou 450001, PR China*

\*Corresponding authors: Prof. Dr Xiaoyu Cao

Fax: +86-731-88879616 Tel: +86-731-88879616

E-mail: [gp-gepeng@csu.edu.cn](mailto:gp-gepeng@csu.edu.cn), [caoxy@haut.edu.cn](mailto:caoxy@haut.edu.cn)

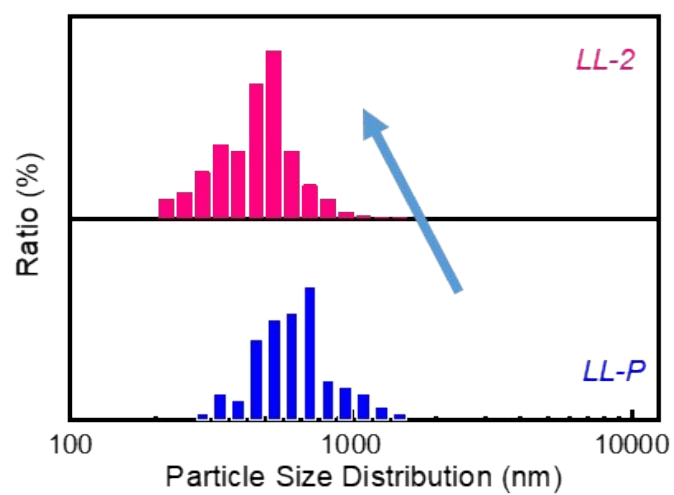

**Fig. S1** The particles size distribution of LL-2 and LL-P

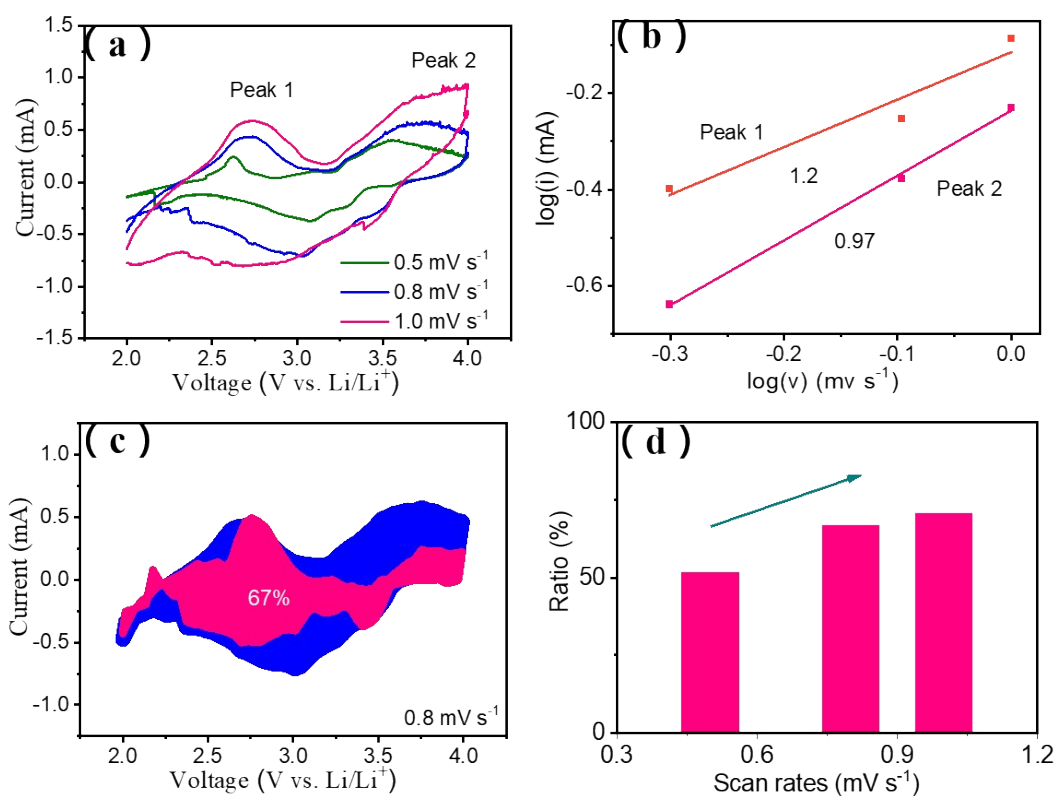

**Fig. S2** The kinetic analysis of  $V_2O_5$ : CV curves at  $0.5 \text{ mV s}^{-1}$ ,  $0.8 \text{ mV s}^{-1}$ ,  $1.0 \text{ mV s}^{-1}$ ; the  $\log(i_p)$  vs.  $\log(v)$  (b), the capacity contribution of capacitive-controlled (pink) and diffusion contribution (blue) (c), the pseudo-capacitive contributions at different scan rates.

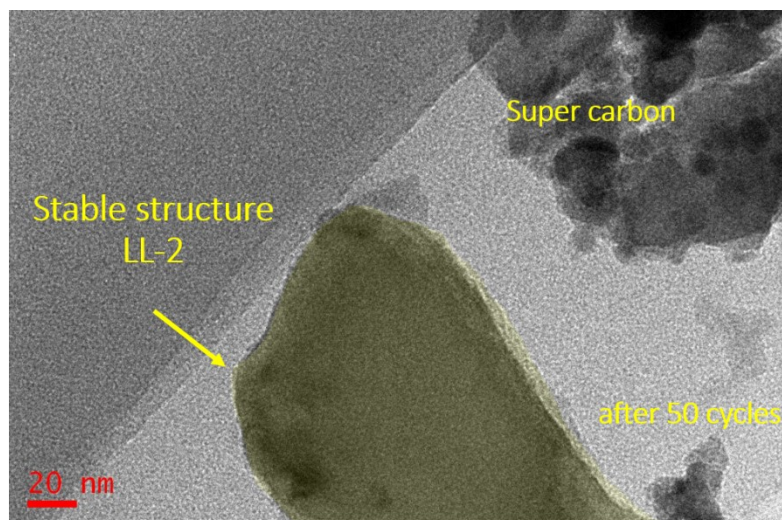

**Fig. S3** The TEM images of LL-2 after 50 cycles.
